# Supplementary material for: A green approach for aerobic oxidation of benzylic alcohols catalysed by CuI–Y zeolite/TEMPO in ethanol without additional additives
Source: Royal Society of Chemistry journal article supplement (doi:10.1039/d0nj03776a), 2020-12-10
Supplement: d0nj03776a1.pdf [file d0nj03776a1.pdf]

## Electronic Supplementary Information

### **A green approach for aerobic oxidation of benzylic alcohols catalysed by Cu<sup>I</sup>-Y zeolite / TEMPO in ethanol without additional additives**

Samuthirarajan Senthilkumar,<sup>a</sup> Wei Zhong,<sup>\*a</sup> Mookan Natarajan,<sup>a</sup> Chunxin Lu,<sup>a</sup> Binyu Xu<sup>b</sup> and Xiaoming Liu<sup>\*a</sup>

1. Table S1. EDX analysis results of Cu<sup>I</sup>-Y zeolite.
2. Figure S1. EDX spectrum of Cu<sup>I</sup>-Y zeolite.
3. Table S2 The binding energies (eV) of XPS results of Cu, O, Al and Si in fresh and recycled Cu<sup>I</sup>-Y zeolite.
4. Figure S2. Standard Curve for Benzylalcohol using 1,2-dichlorobenzene as internal standard
5. Figure S3. Standard Curve for Benzaldehyde using 1,2-dichlorobenzene as internal standard
6. Figure S4. GC Spectrum of oxidation of alcohol under N<sub>2</sub> atmosphere
7. Figure S5. GC Spectrum of oxidation of alcohol under atmospheric air
8. Figure S6-S17. <sup>1</sup>H & <sup>13</sup>C-NMR spectra of selected compounds
10. Figure S18-S34. GC-MS spectrum of the products
11. References

**Table S1.** EDX analysis results of Cu<sup>I</sup>-Y zeolite.

| Element   | Atomic number | Series   | normal wt. (%) | normal. at. (%) |
|-----------|---------------|----------|----------------|-----------------|
| Oxygen    | 8             | K-series | 42.79          | 62.41           |
| Aluminium | 13            | K-series | 9.14           | 7.91            |
| Silicon   | 14            | K-series | 25.94          | 21.55           |
| Copper    | 29            | K-series | 22.12          | 8.13            |

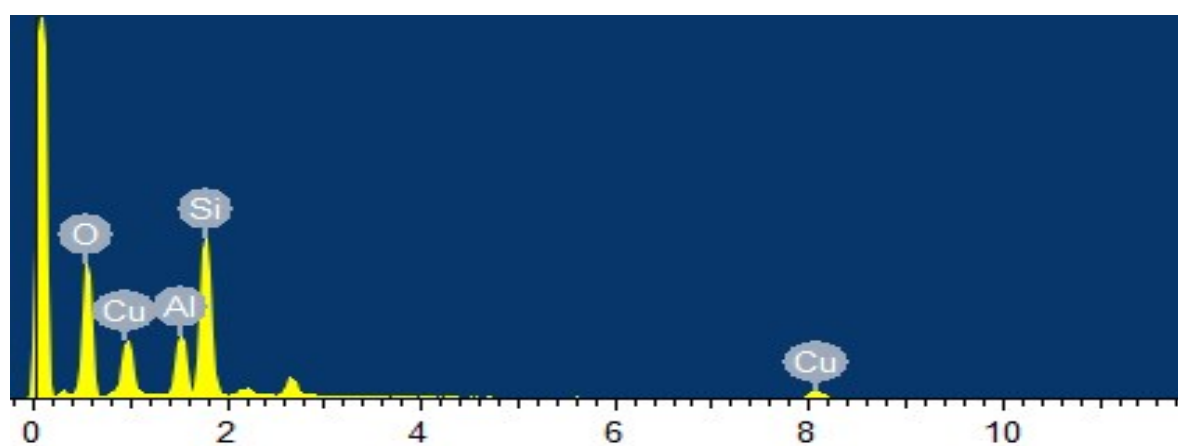

**Figure S1.** EDX spectrum of Cu<sup>I</sup>-Y zeolite.

**Table S2.** The binding energies (eV) of XPS results of Cu, O, Al and Si in fresh and recycled Cu<sup>I</sup>-Y zeolite.

|                         | <b>Cu<sup>+</sup> 2p<sub>1/2</sub></b> | <b>Cu<sup>2+</sup> 2p<sub>1/2</sub></b> | <b>Cu<sup>2+</sup> Sat.</b> | <b>Cu<sup>+</sup> 2p<sub>3/2</sub></b> | <b>Cu<sup>2+</sup> 2p<sub>3/2</sub></b> | <b>Cu<sup>2+</sup> Sat.</b> | <b>O 1s</b> | <b>Al 2p</b> | <b>Si 2p</b>  |
|-------------------------|----------------------------------------|-----------------------------------------|-----------------------------|----------------------------------------|-----------------------------------------|-----------------------------|-------------|--------------|---------------|
| Fresh catalyst          | 952.13                                 | 954.50                                  | 943.18                      | 932.25                                 | 934.46                                  | 962.80                      | 532.50      | 74.78 77.68  | 101.98        |
|                         |                                        |                                         |                             |                                        |                                         |                             | 531.70      |              | 102.58 103.18 |
|                         |                                        |                                         |                             |                                        |                                         |                             | 530.80      |              |               |
| Related peak area       | 24694.50                               | 18721.4                                 | 16757.60                    | 28721.70                               | 21078.70                                | 21982.70                    | 36703.70    | 4186.70      | 9101.50       |
|                         |                                        |                                         |                             |                                        |                                         |                             | 166703.70   | 2287.50      | 17688.00      |
|                         |                                        |                                         |                             |                                        |                                         |                             | 21703.70    |              | 8457.70       |
| 5 <sup>th</sup> recycle | 952.00                                 | 954.98                                  | 943.88                      | 932.28                                 | 934.88                                  | 941.60                      | 532.50      | 74.60 77.70  | 101.95        |
|                         |                                        |                                         |                             |                                        |                                         |                             | 531.80      |              | 102.74        |
|                         |                                        |                                         |                             |                                        |                                         |                             | 530.90      |              | 103.50        |
| Related peak area       | 18955.50                               | 21891.30                                | 20443.90                    | 22394.20                               | 19473.50                                | 16268.90                    | 66326.10    | 4015.30      | 8938.70       |
|                         |                                        |                                         |                             |                                        |                                         |                             | 116703.70   | 2148.90      | 17060.00      |
|                         |                                        |                                         |                             |                                        |                                         |                             | 15990.00    |              | 8429.30       |

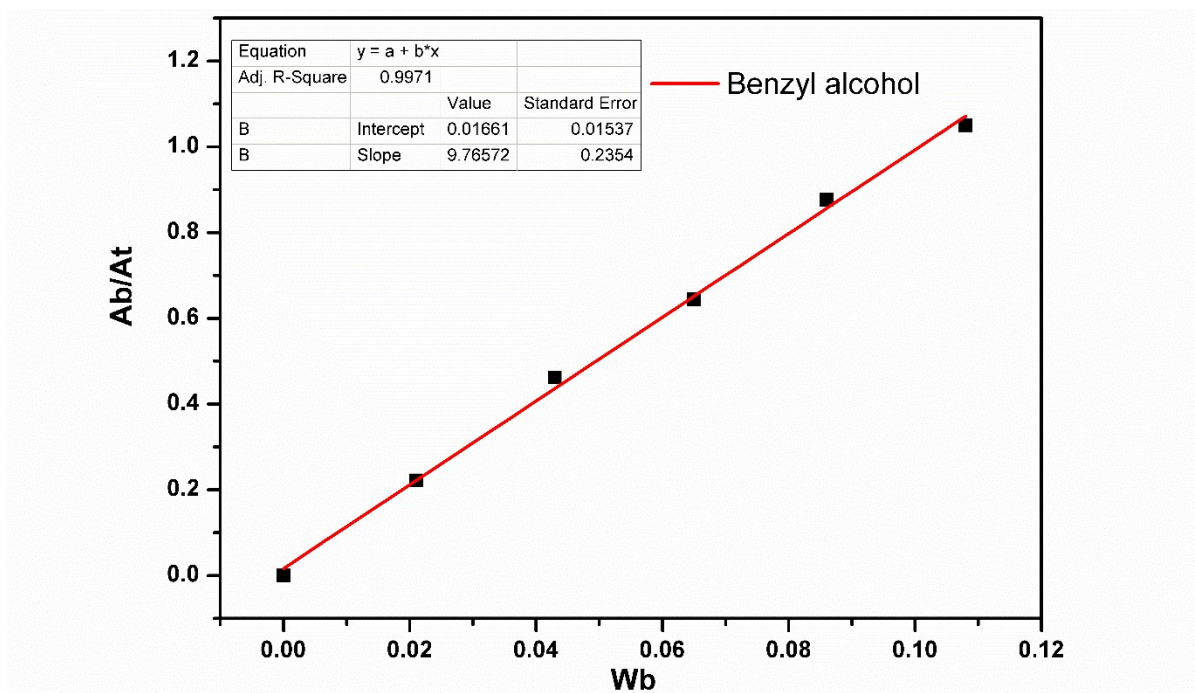

**Figure S2.** Standard curve for benzyl alcohol using 1,2-dichlorobenzene (1 mmol) as internal standard (Where Ab = area of benzyl alcohol, At = area of 1,2-dichlorobenzene, Wt = Weight percentage of benzyl alcohol).

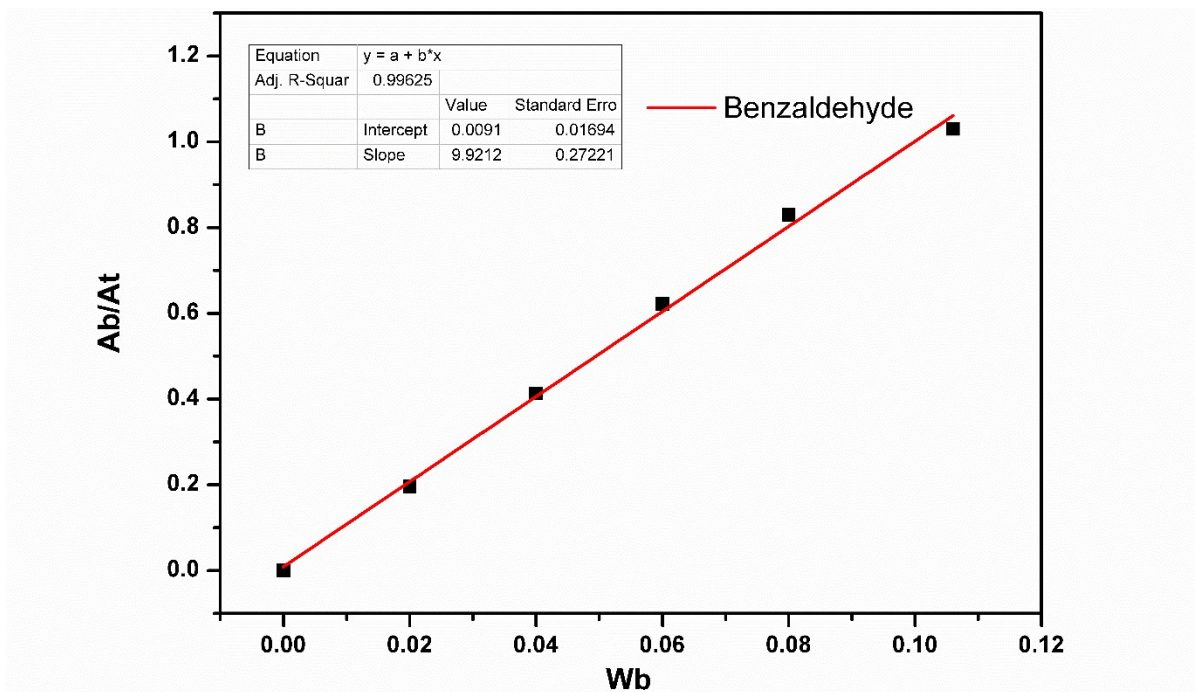

**Figure S3.** Standard curve for benzaldehyde using 1,2-dichlorobenzene (1 mmol) as internal standard (Where Ab = area of benzaldehyde, At = area of 1,2-dichlorobenzene, Wt = Weight percentage of benzaldehyde).

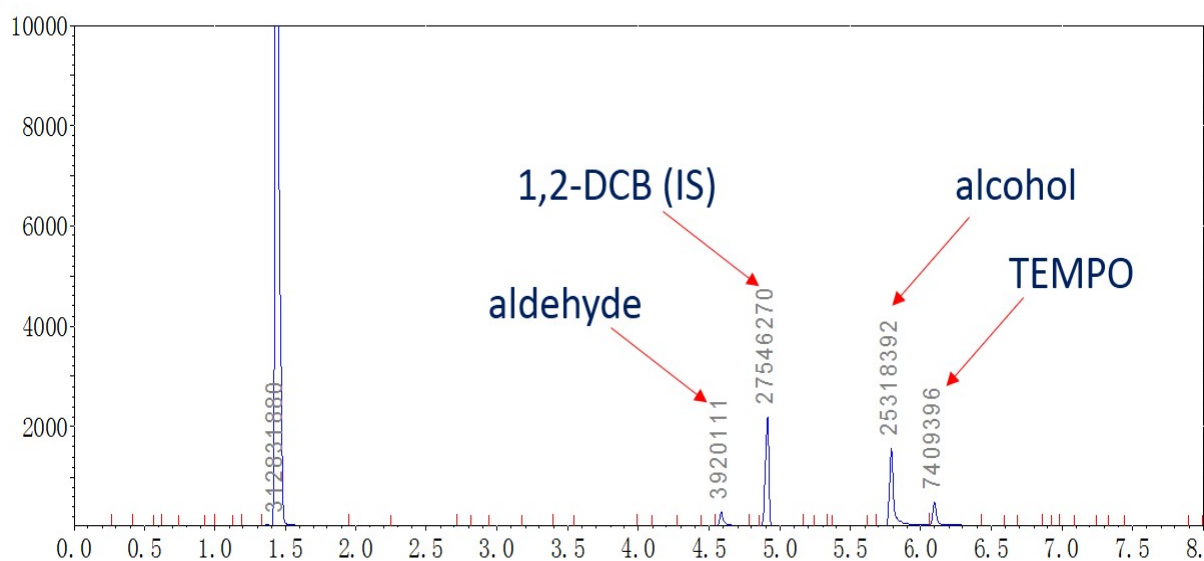

**Figure S4.** GC Spectrum for oxidation of benzyl alcohol under N<sub>2</sub> atmosphere. (Benzyl alcohol (1 mmol), zeolite catalyst (100 mg), TEMPO (39 mg, 0.25 mmol which 25% based on the substrate), 1,2-dichlorobenzene (1 mmol), solvent (3 mL), 60 °C, 18 hrs.)

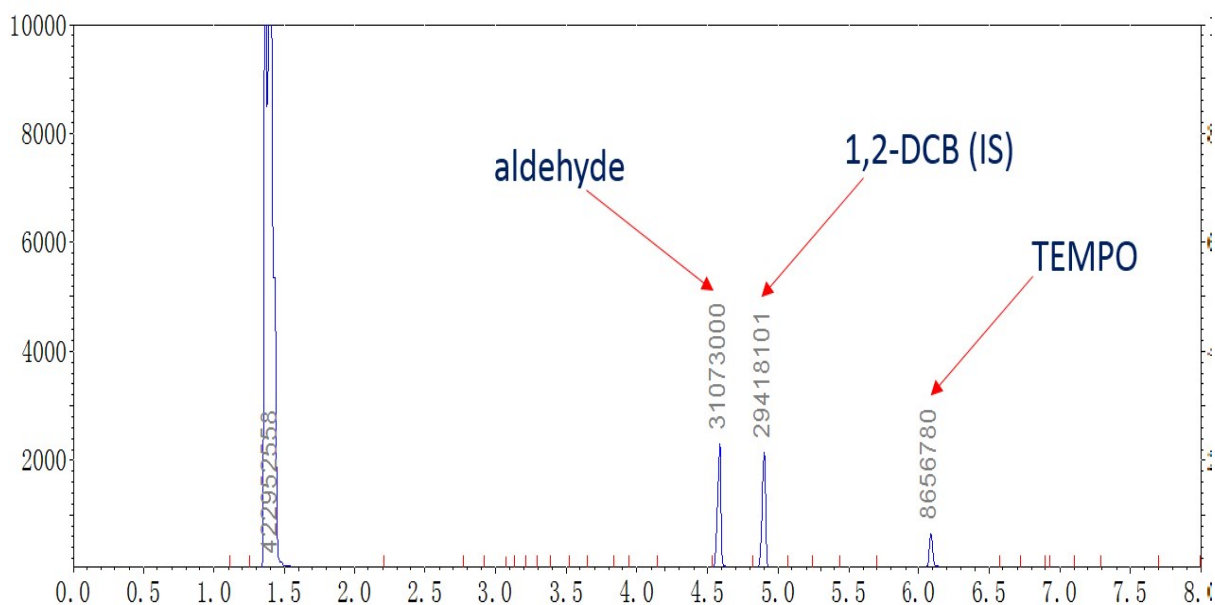

**Figure S5.** GC Spectrum for aerobic oxidation of benzyl alcohol under atmospheric air. (Benzyl alcohol (1 mmol), zeolite catalyst (100 mg), TEMPO (39 mg, 0.25 mmol which 25% based on the substrate), 1,2-dichlorobenzene (1 mmol), solvent (3 mL), 60 °C, 18 hrs.)

## Spectral data of selected compounds:

### Benzaldehyde<sup>1</sup>:

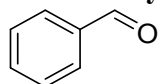

**Oily liquid, 105 mg, isolated yield: 99%.** <sup>1</sup>H NMR (400 MHz, CDCl<sub>3</sub>, ppm): δ 10.01 (s, 1H), 7.86 (d, *J* = 8, 2H), 7.61 (t, 1H), 7.51 (t, 2H); <sup>13</sup>C NMR (100 MHz, CDCl<sub>3</sub>, ppm): δ 192.41, 136.37, 134.45, 129.72, 128.98.

### Cinnamaldehyde<sup>1</sup>:

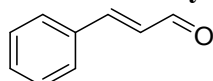

**Oily liquid, 113 mg, isolated yield: 85%.** <sup>1</sup>H NMR (400 MHz, CDCl<sub>3</sub>, ppm): δ 9.8 (d, *J* = 8, 1H), 7.63 (m, 2H), 7.54 (d, *J* = 8, 4H), 6.82 (dd, *J* = 16, 1H); <sup>13</sup>C NMR (100 MHz, CDCl<sub>3</sub>, ppm): δ 193.92, 153.0, 134.09, 131.46, 129.28, 128.75, 128.67.

### 2-methylbenzaldehyde<sup>2</sup>:

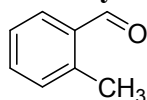

**Oily liquid, 107 mg, isolated yield: 89%.** <sup>1</sup>H NMR (400 MHz, CDCl<sub>3</sub>, ppm): δ 10.28 (s, 1H), 7.8 (d, *J* = 8, 1H), 7.48 (t, 1H), 7.38 (t, 1H), 7.29 (d, *J* = 4, 1H); <sup>13</sup>C NMR (100 MHz, CDCl<sub>3</sub>, ppm): δ 192.84, 133.63, 132.03, 131.76, 126.31, 19.58.

### 2,5-dimethylbenzaldehyde<sup>3</sup>:

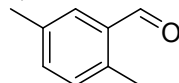

**Oily liquid, 85 mg, isolated yield: 63%.** <sup>1</sup>H NMR (400 MHz, CDCl<sub>3</sub>, ppm): δ 10.27 (s, 1H), 7.63 (s, 1H), 7.17 (d, *J* = 4, 1H), 7.03 (d, *J* = 4, 1H), 2.40 (s, 3H), 2.31 (s, 3H); <sup>13</sup>C NMR (100 MHz, CDCl<sub>3</sub>, ppm): δ 192.81, 133.63, 132.03, 131.76, 126.31, 19.59.

### 4-*t*-butylbenzaldehyde<sup>4</sup>:

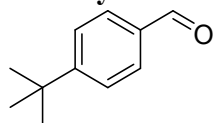

**Oily liquid, 124 mg, isolated yield: 76%.** <sup>1</sup>H NMR (400 MHz, CDCl<sub>3</sub>, ppm): δ 9.98 (s, 1H), 7.82 (d, *J* = 4, 1H), 7.55 (d, *J* = 4, 2H), 7.48 (d, *J* = 4, 1H), 1.35 (s, 9H); <sup>13</sup>C NMR (100 MHz, CDCl<sub>3</sub>, ppm): δ 192.08, 130.06, 129.68, 125.97, 125.46, 31.05.

### 2-thiophenecarboxaldehyde<sup>1</sup>:

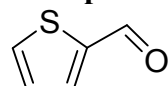

**Brown oily liquid, 56 mg, isolated yield: 50 %.** <sup>1</sup>H NMR (400 MHz, CDCl<sub>3</sub>, ppm): δ 9.94 (s, 1H), 7.78 (m, 2H), 7.22 (d, *J* = 4, 2H); <sup>13</sup>C NMR (100 MHz, CDCl<sub>3</sub>, ppm): δ 182.96, 136.25, 135.1, 128.28.

# $^1\text{H}$ & $^{13}\text{C}$ -NMR spectra of selected compounds :

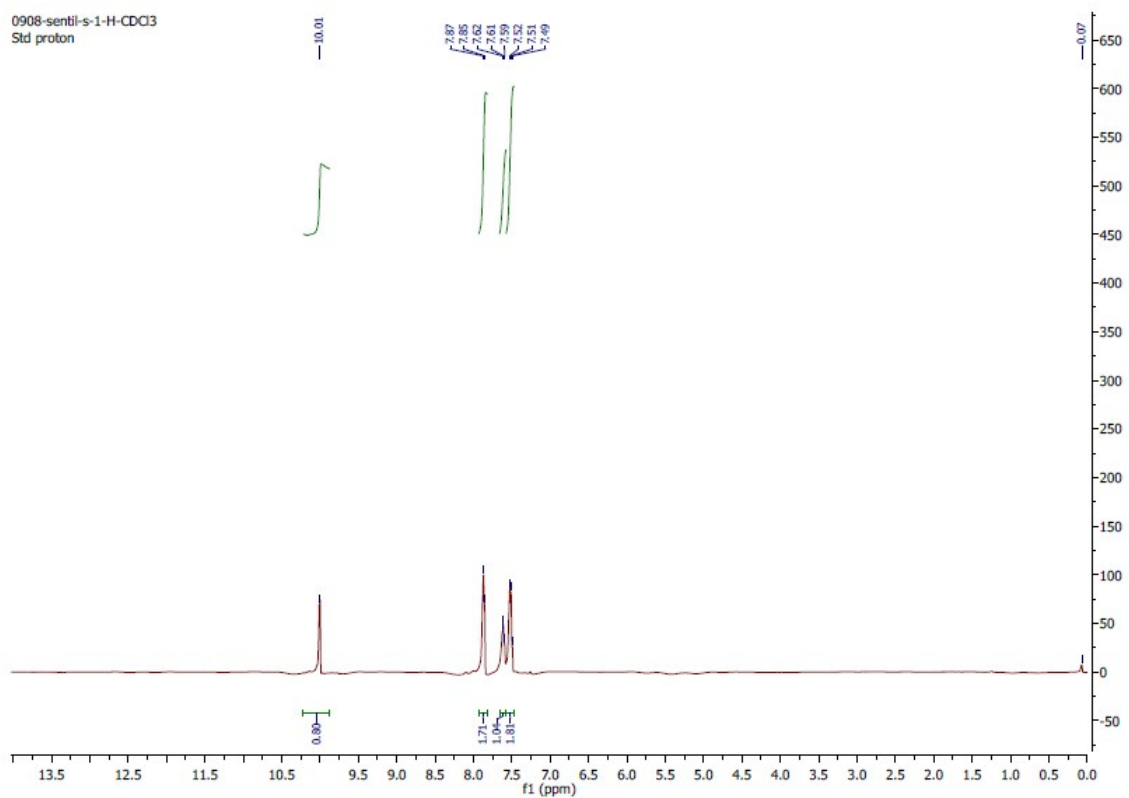

Figure S6.  $^1\text{H}$  NMR spectrum of benzaldehyde in  $\text{CDCl}_3$ .

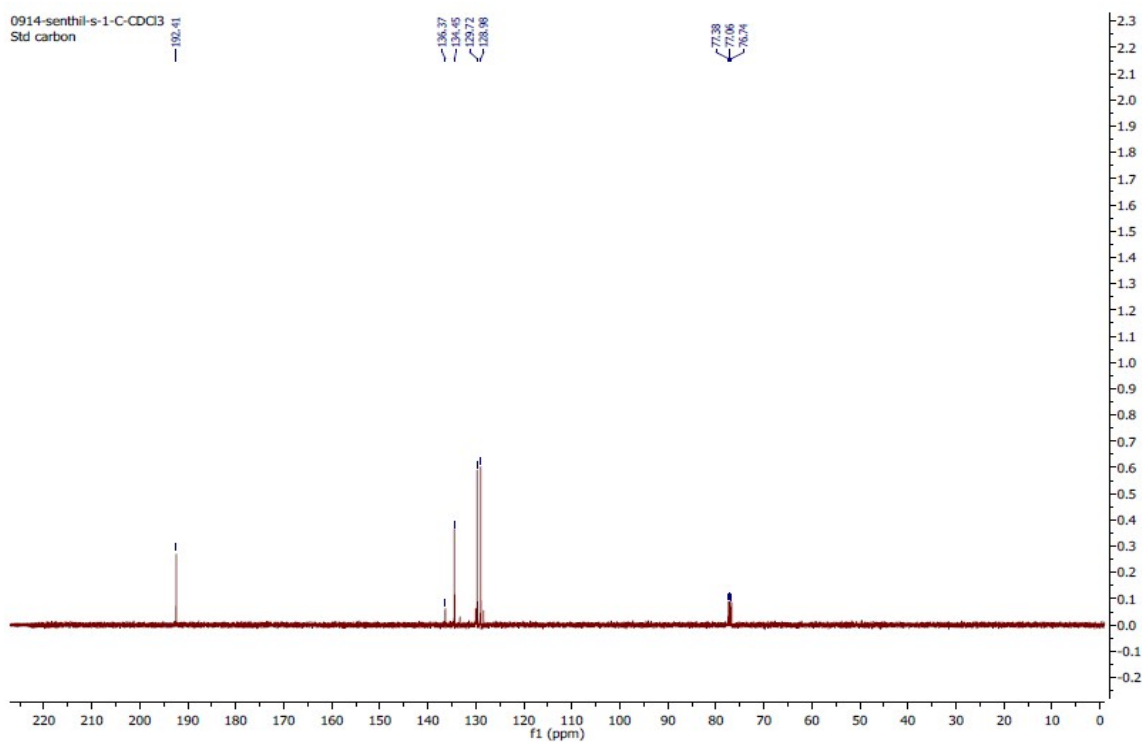

Figure S7.  $^{13}\text{C}$  NMR spectrum of benzaldehyde in  $\text{CDCl}_3$ .

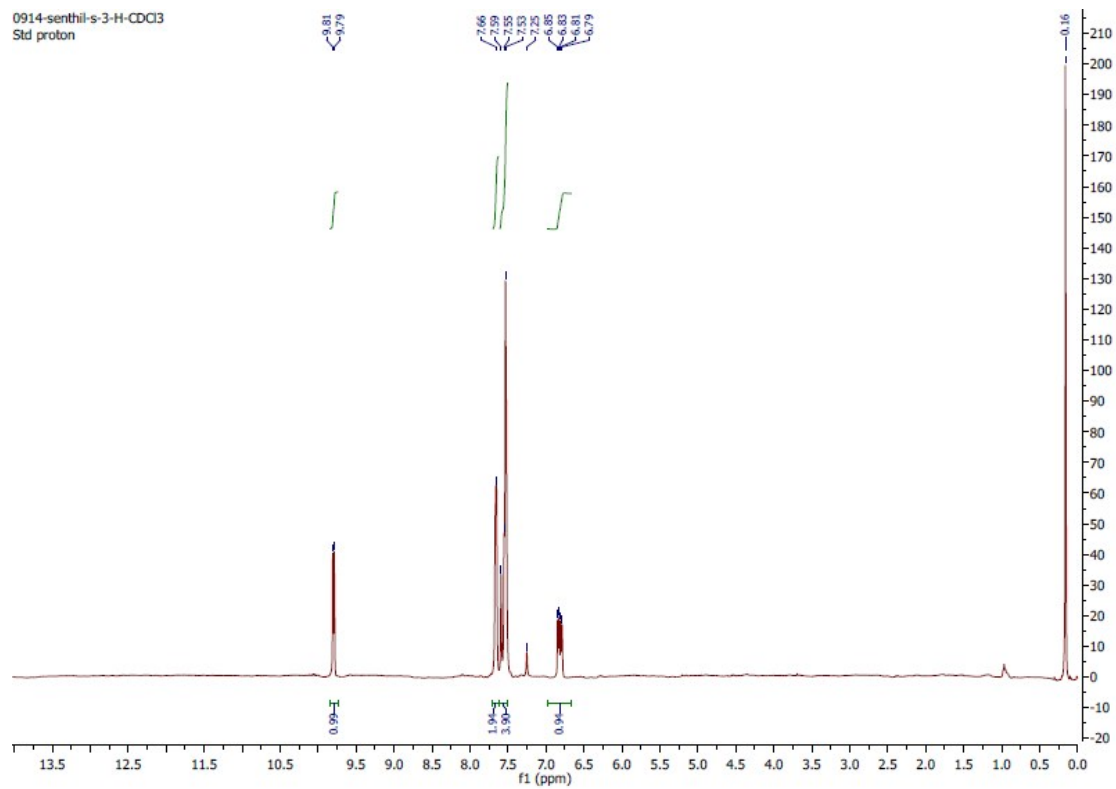

Figure S8.  $^1\text{H}$  NMR spectrum of cinnamaldehyde in  $\text{CDCl}_3$ .

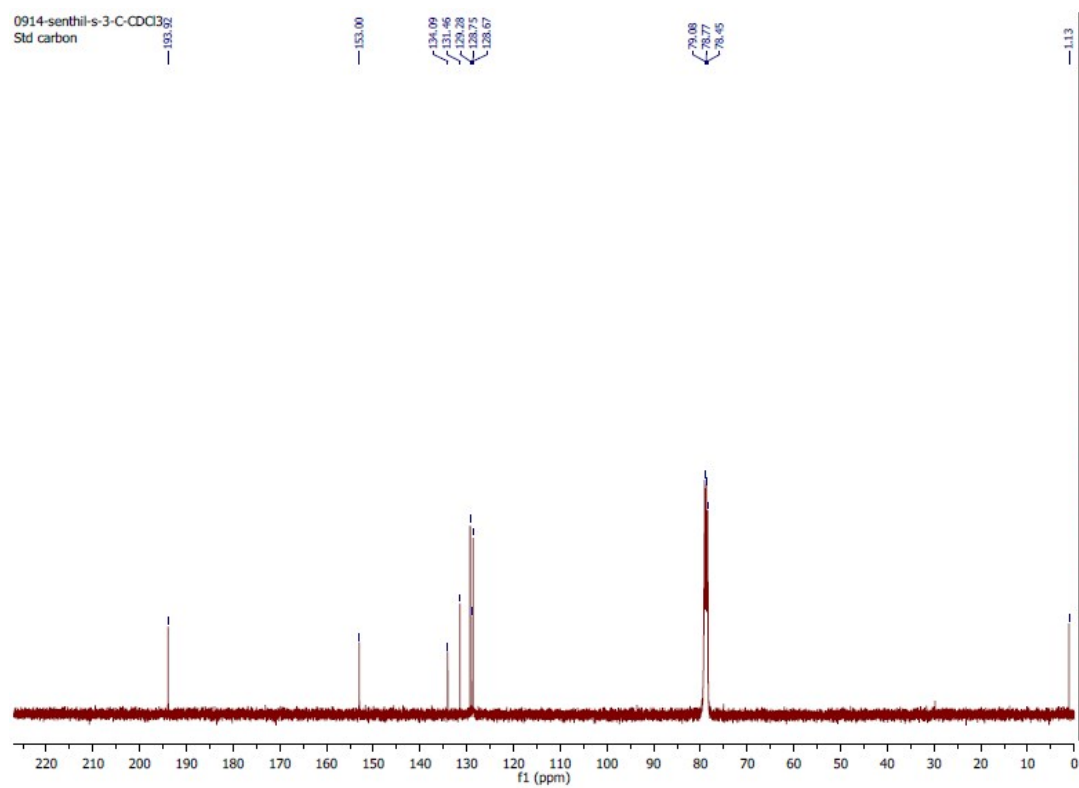

Figure S9.  $^{13}\text{C}$  NMR spectrum of cinnamaldehyde in  $\text{CDCl}_3$ .



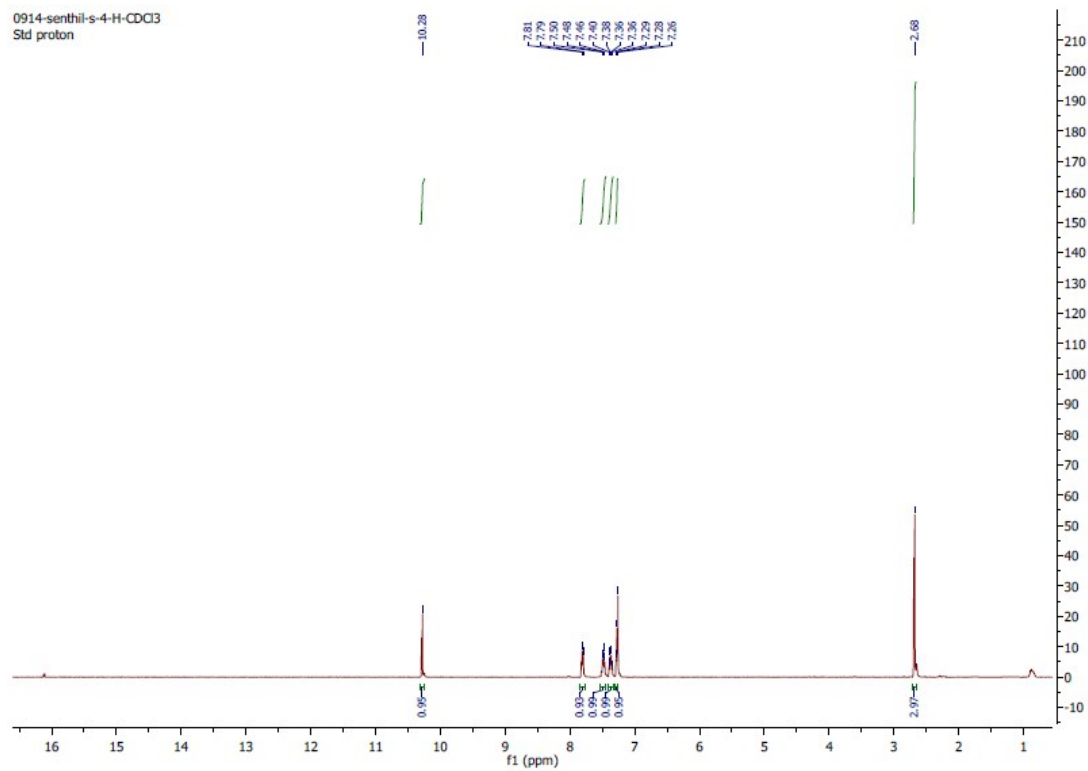

**Figure S10.**  $^1\text{H}$  NMR spectrum of 2-methylbenzaldehyde in  $\text{CDCl}_3$ .

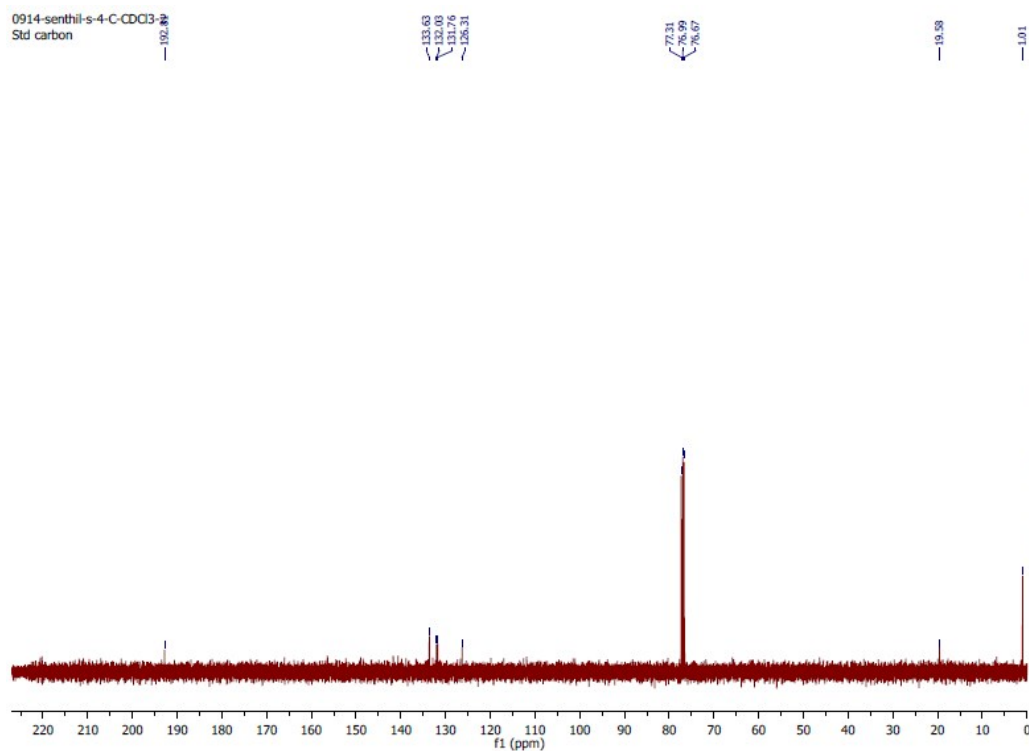

**Figure S11.**  $^{13}\text{C}$  NMR spectrum of 2-methylbenzaldehyde in  $\text{CDCl}_3$ .

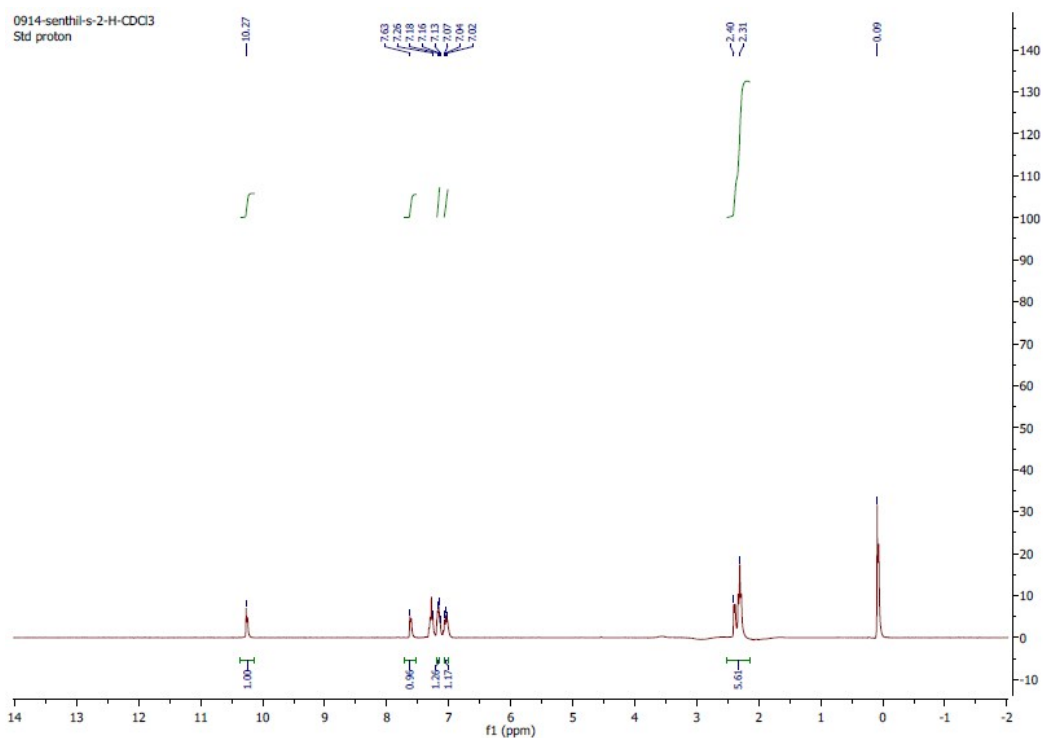

**Figure S12.**  $^1\text{H}$  NMR spectrum of 2,5-dimethylbenzaldehyde in  $\text{CDCl}_3$ .

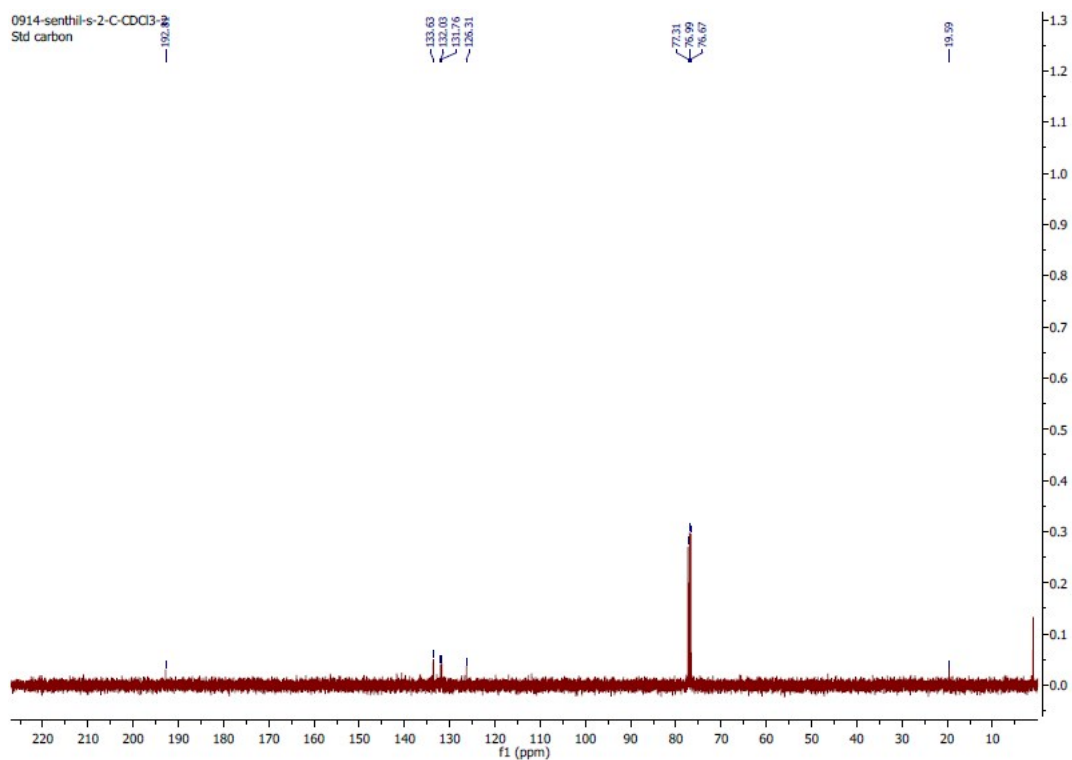

**Figure S13.**  $^{13}\text{C}$  NMR spectrum of 2,5-dimethylbenzaldehyde in  $\text{CDCl}_3$ .

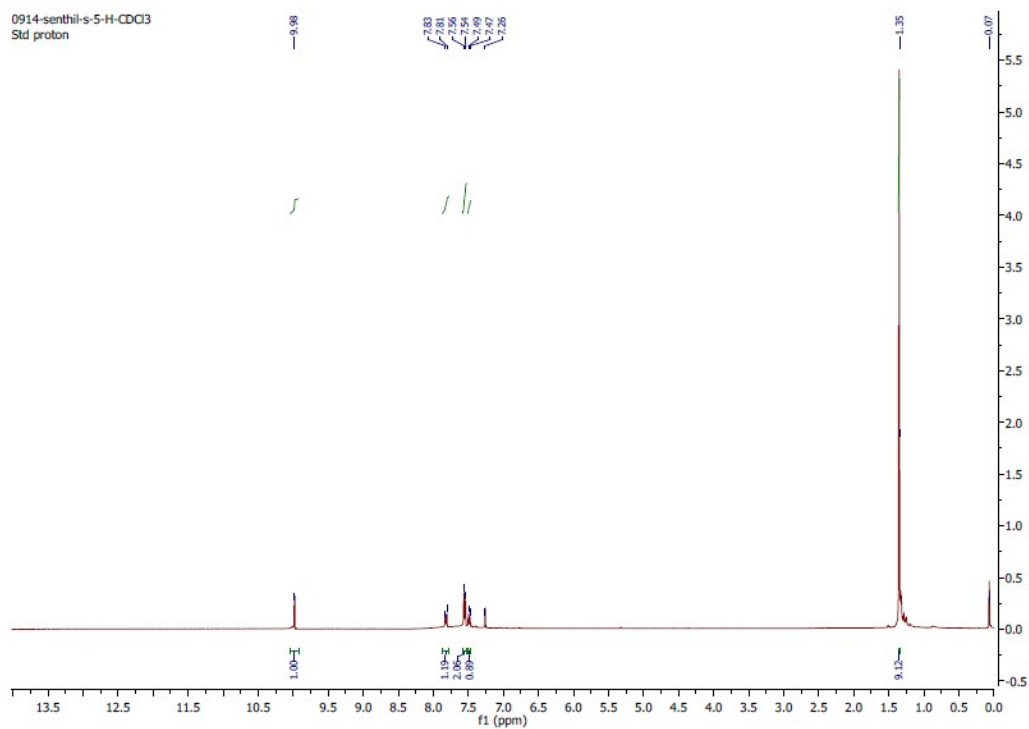

**Figure S14.**  $^1\text{H}$  NMR spectrum of 4-*t*-butylbenzaldehyde in  $\text{CDCl}_3$ .

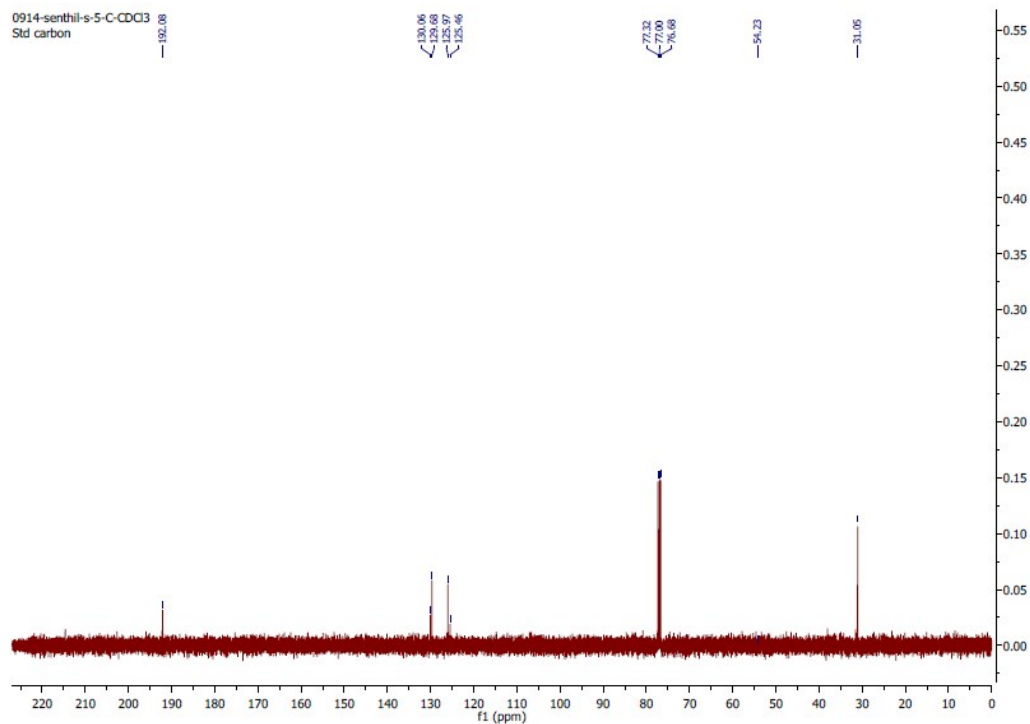

**Figure S15.**  $^{13}\text{C}$  NMR spectrum of 4-*t*-butylbenzaldehyde in  $\text{CDCl}_3$ .

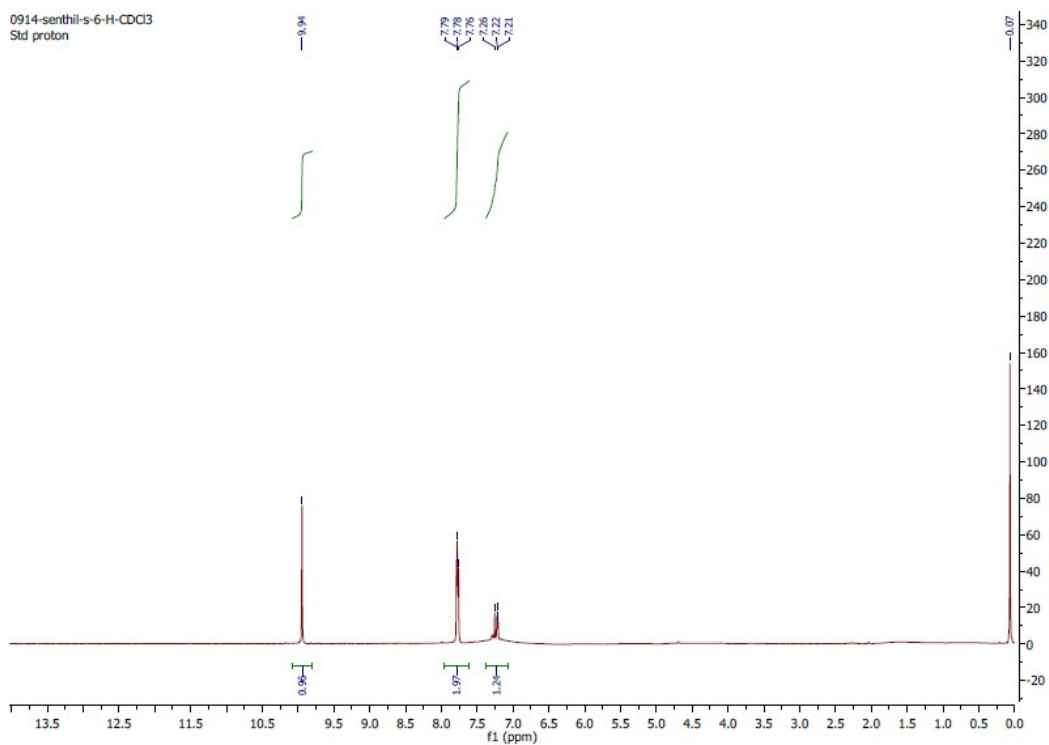

**Figure S16.**  $^1\text{H}$  NMR spectrum of 2-thiophenecarboxaldehyde in  $\text{CDCl}_3$ .

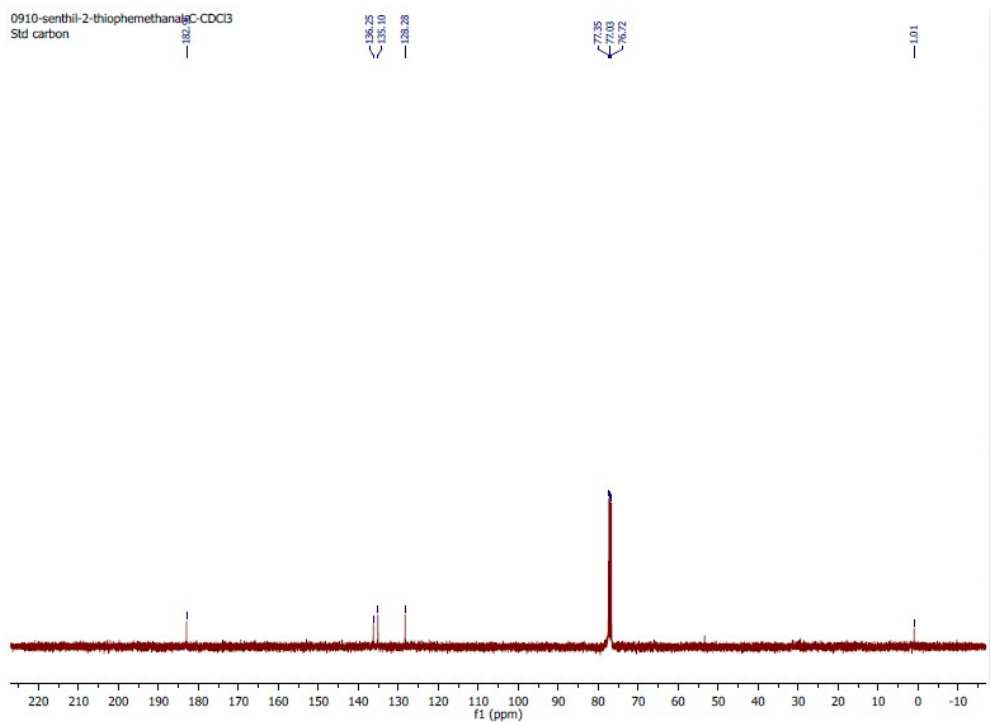

**Figure S17.**  $^{13}\text{C}$  NMR spectrum of 2-thiophenecarboxaldehyde in  $\text{CDCl}_3$ .

**GC-MS spectrum of the products as follows :**

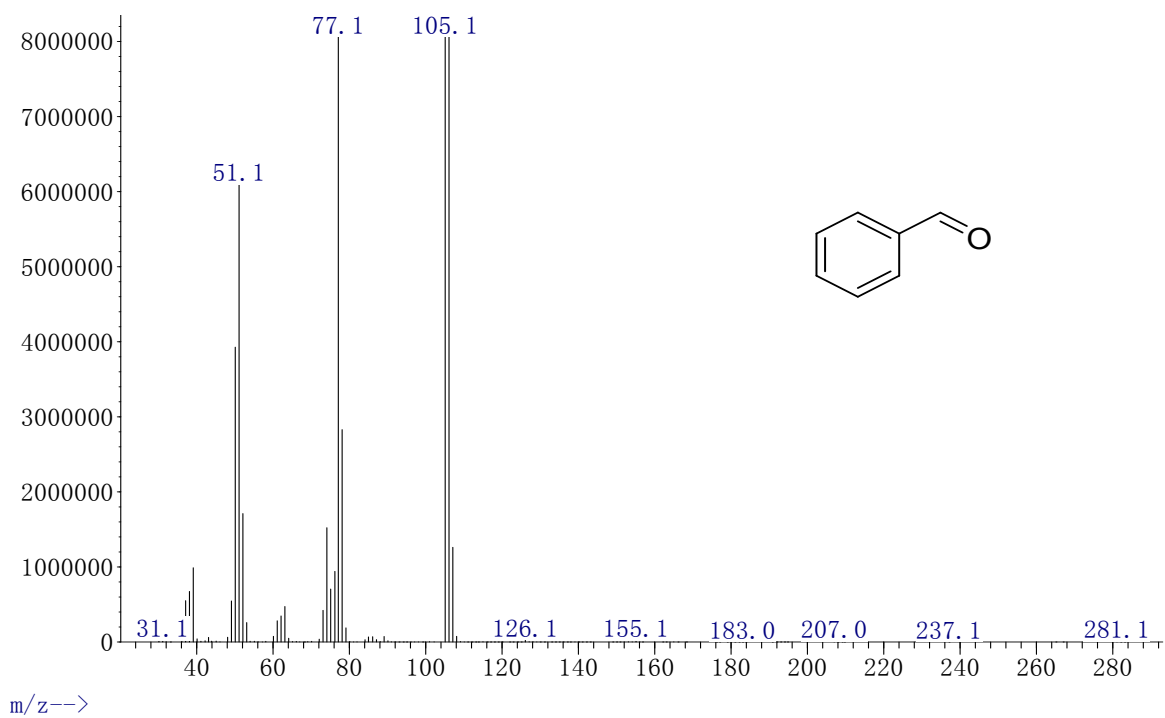

**Figure S18.** GC-MS spectrum of benzaldehyde.

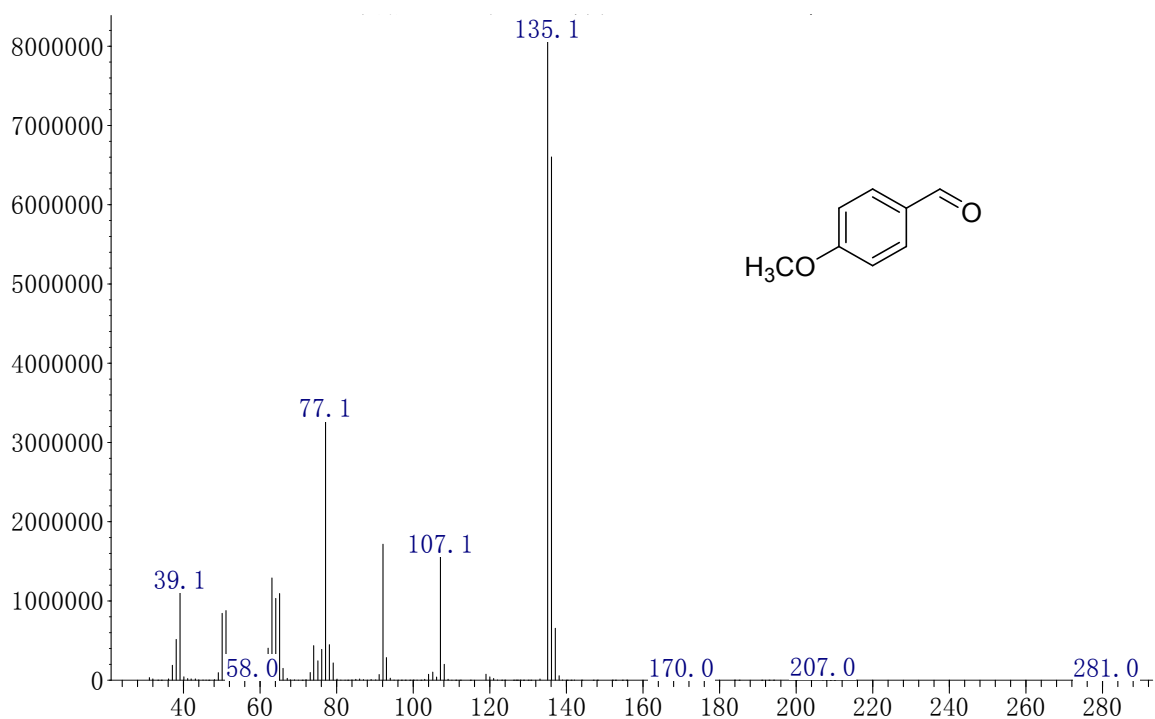

**Figure S19.** GC-MS spectrum of 4-methoxybenzaldehyde.

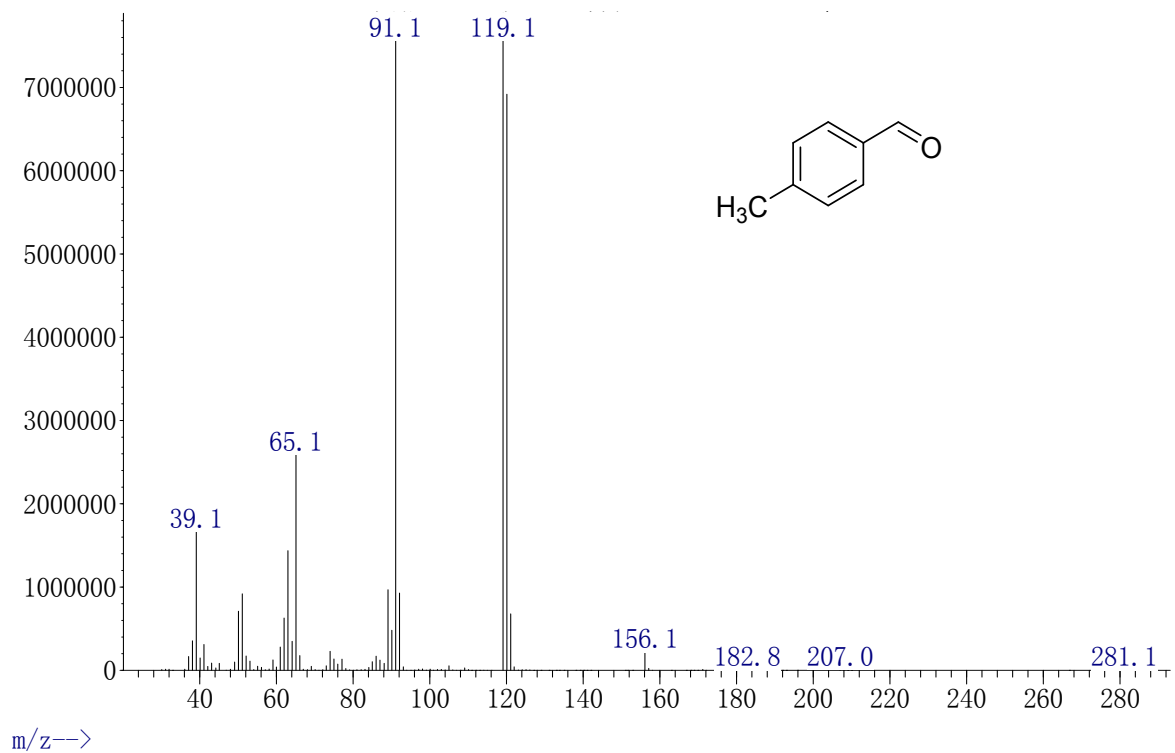

**Figure S20.** GC-MS spectrum of 4-methylbenzaldehyde.

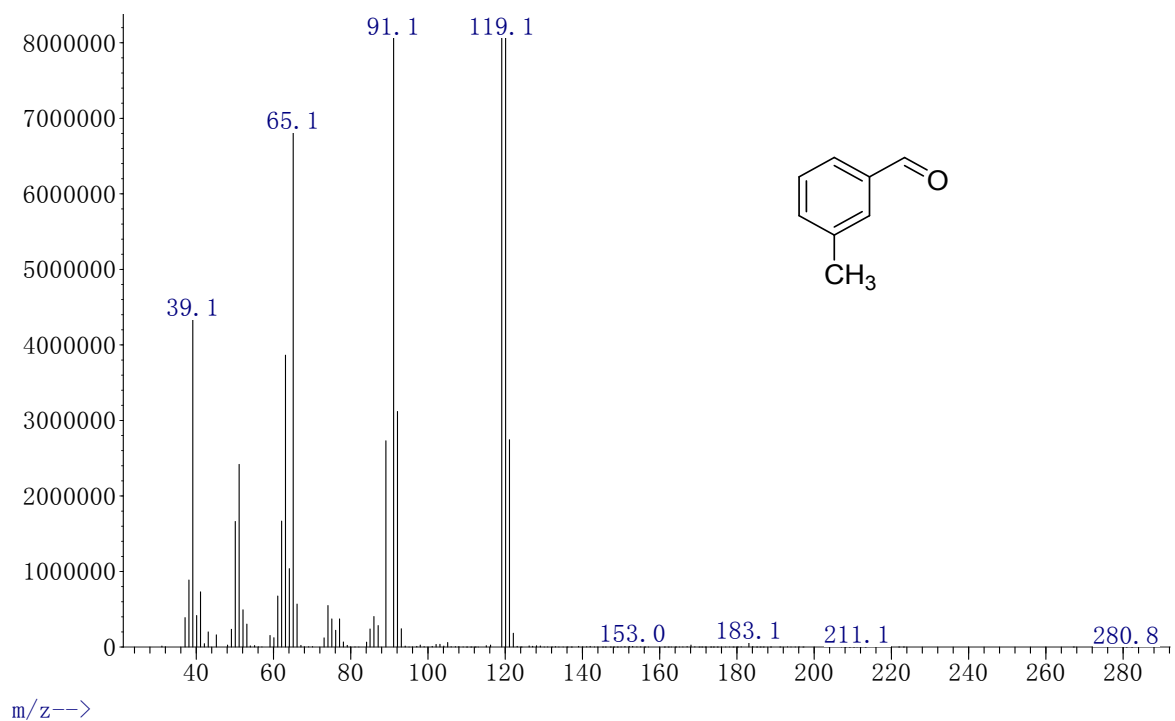

**Figure S21.** GC-MS spectrum of 3-methylbenzaldehyde.

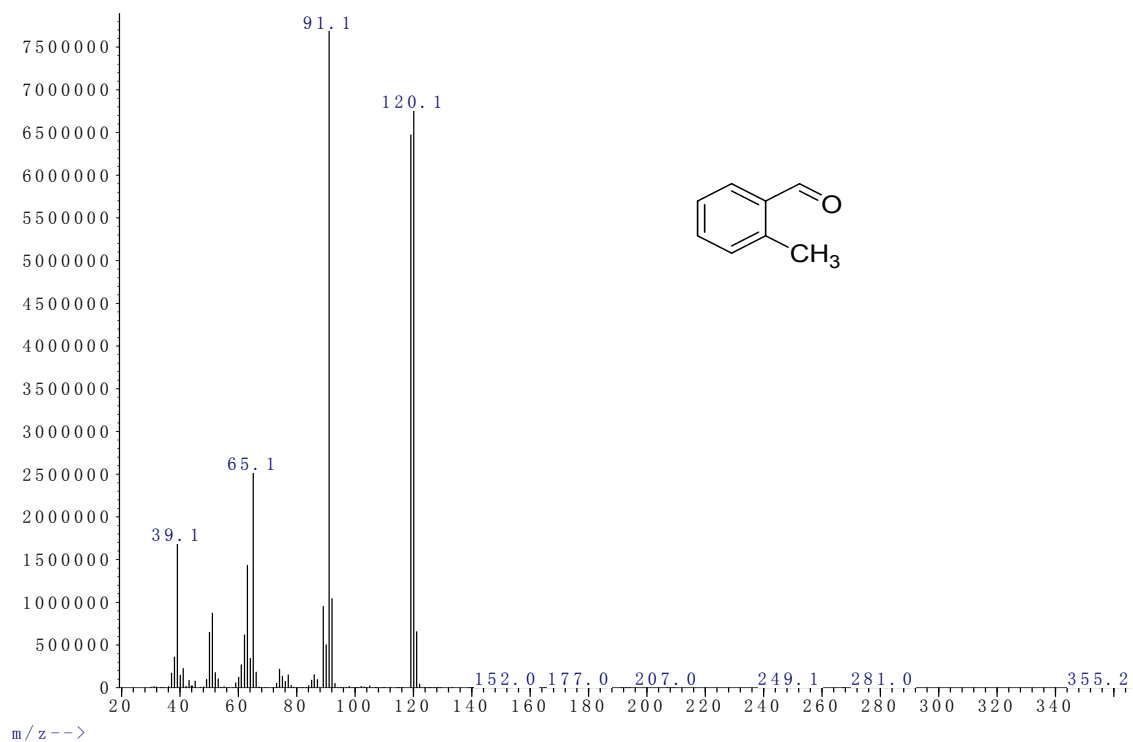

**Figure S22.** GC-MS spectrum of 2-methylbenzaldehyde.

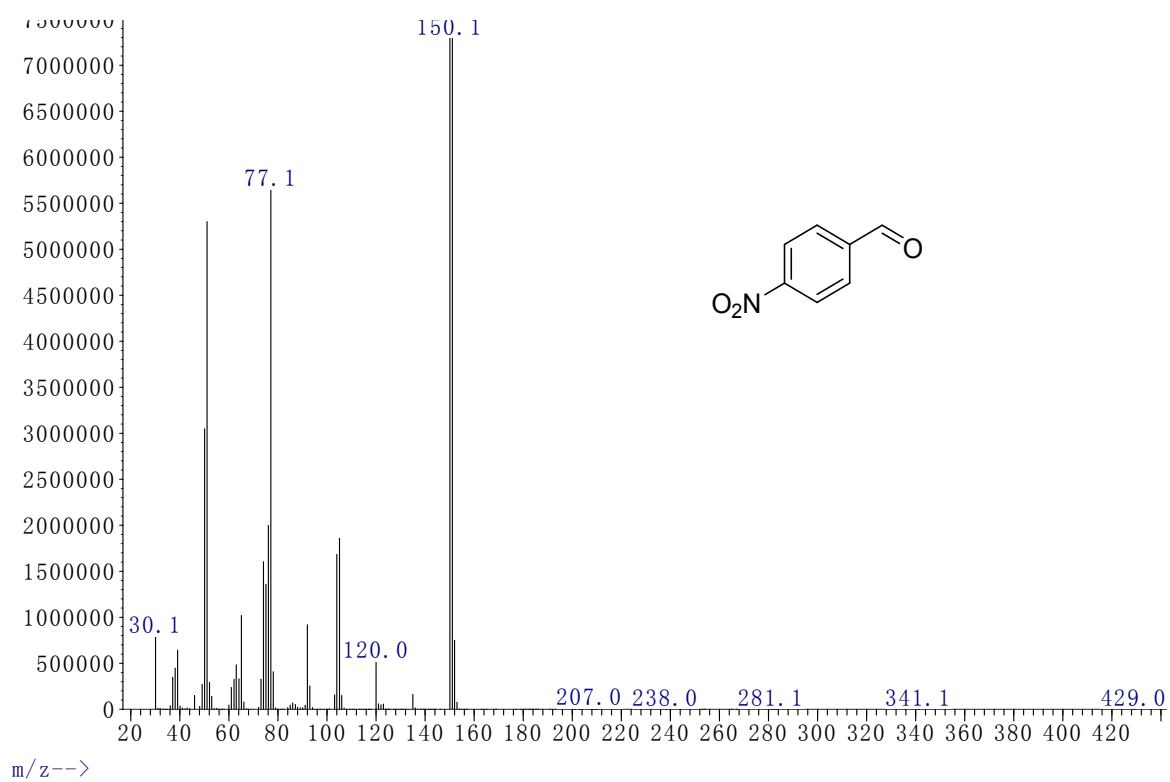

**Figure S23.** GC-MS spectrum of 4-nitrobenzaldehyde.

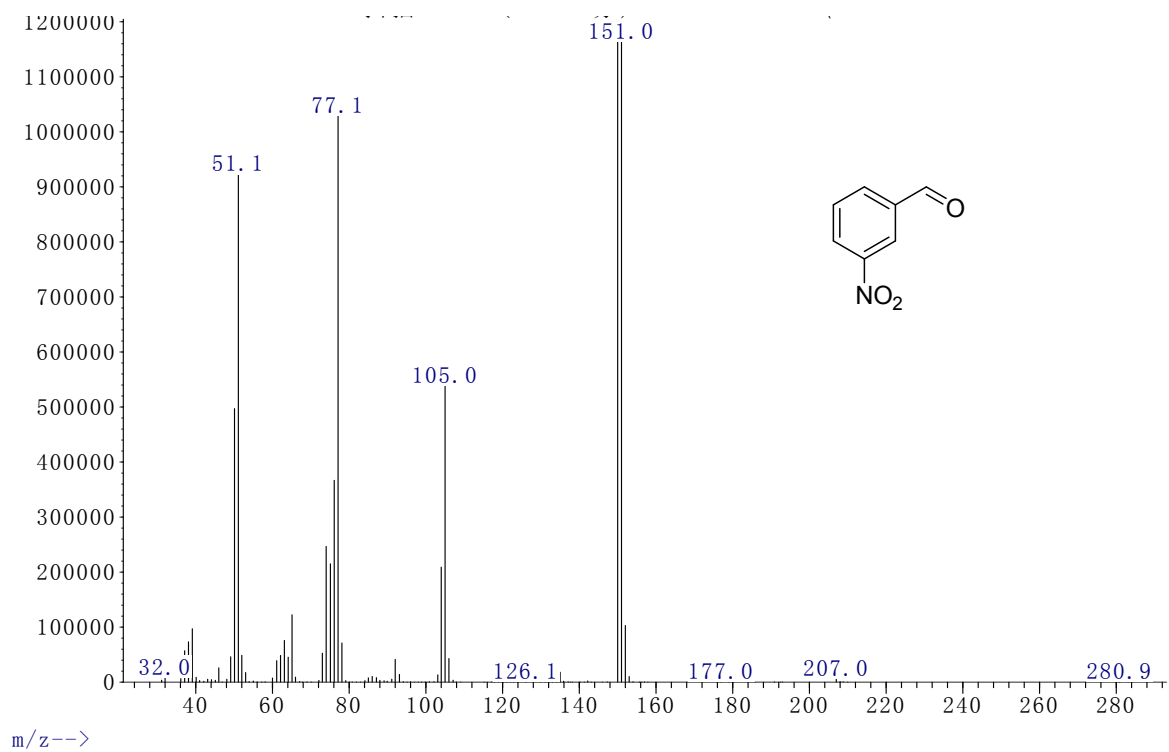

**Figure S24.** GC-MS spectrum of 3-nitrobenzaldehyde.

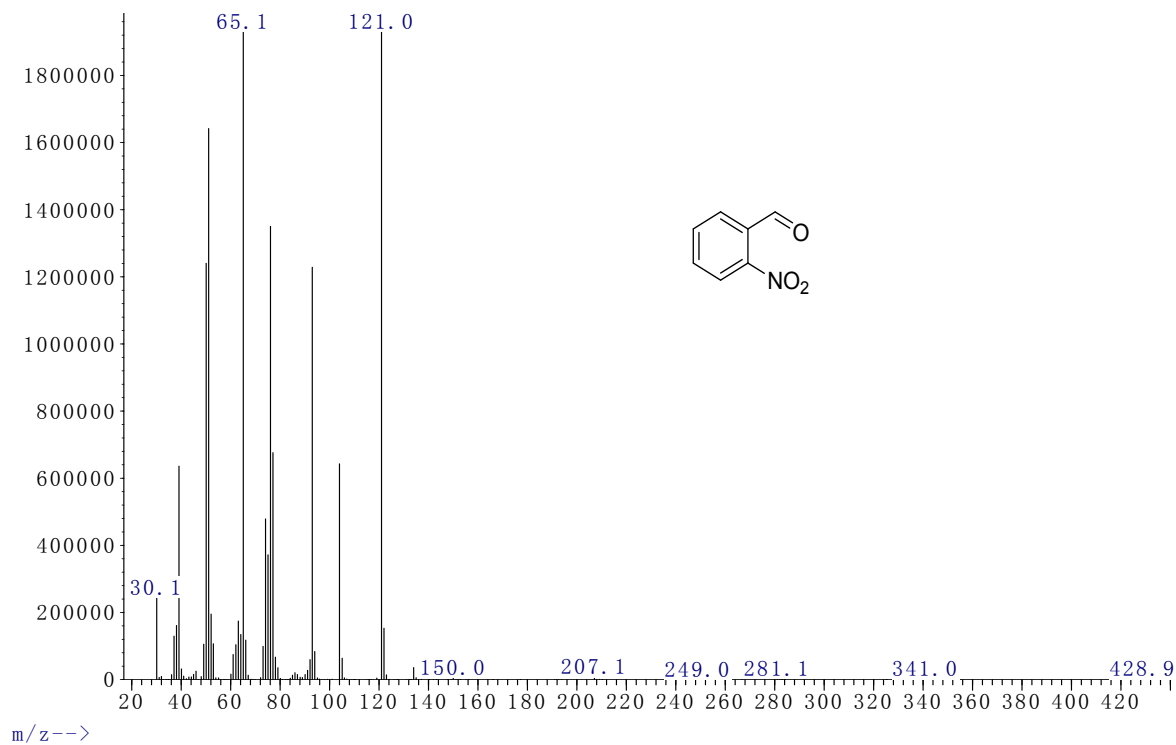

**Figure S25.** GC-MS spectrum of 2-nitrobenzaldehyde.



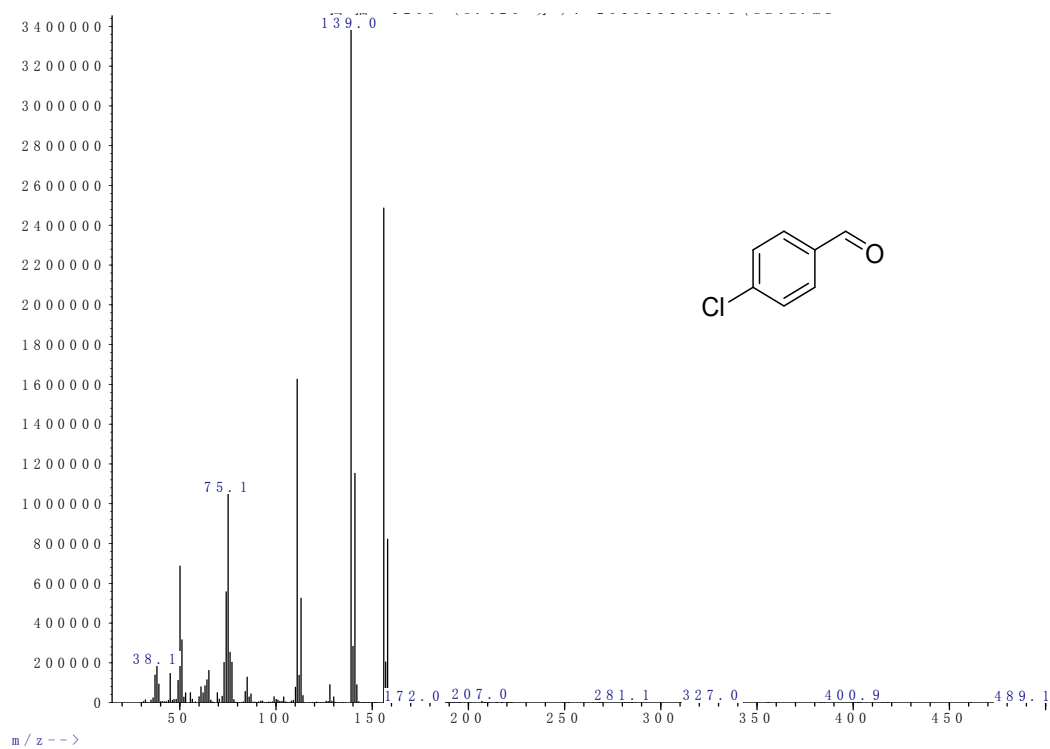

**Figure S26.** GC-MS spectrum of 4-chlorobenzaldehyde.

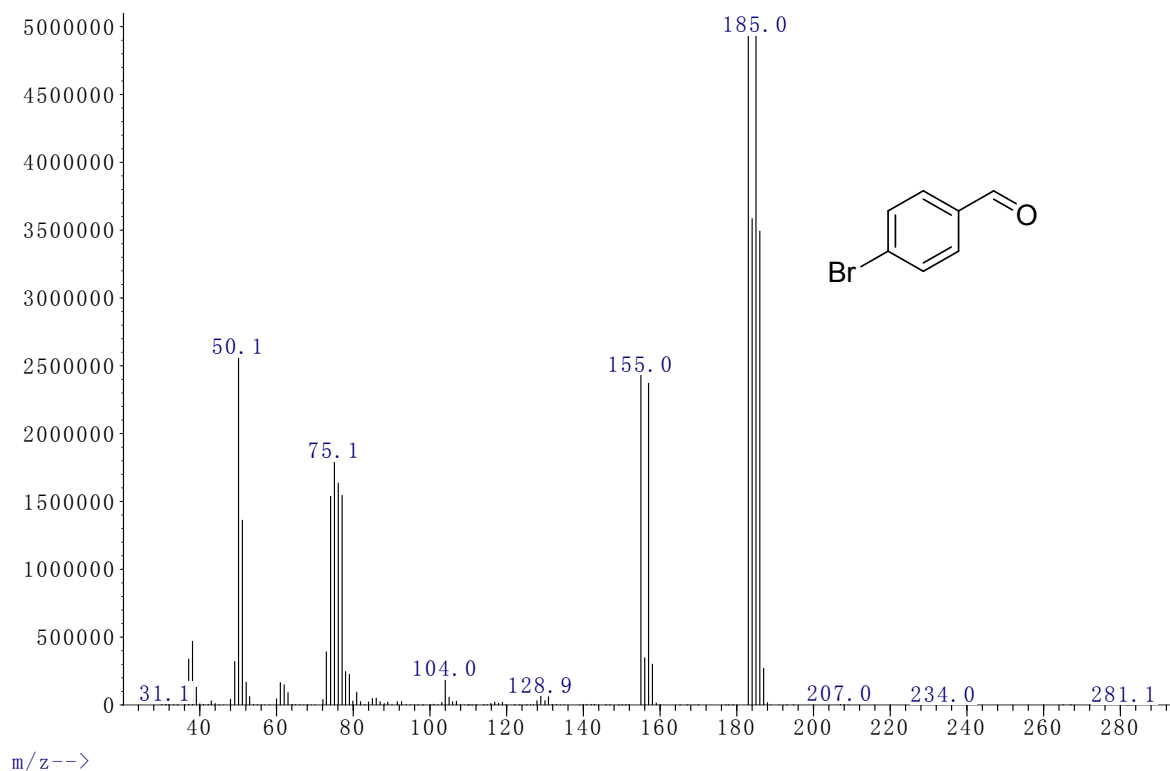

**Figure S27.** GC-MS spectrum of 4-bromobenzaldehyde.

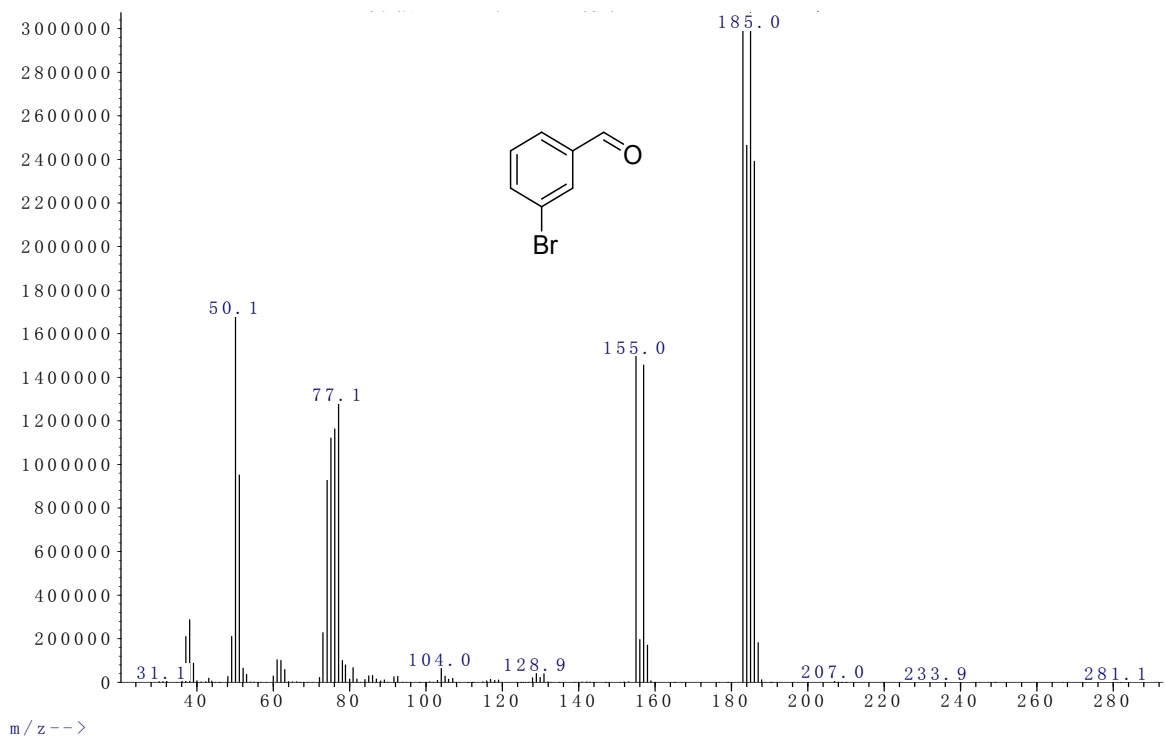

**Figure S28.** GC-MS spectrum of 3-bromobenzaldehyde.

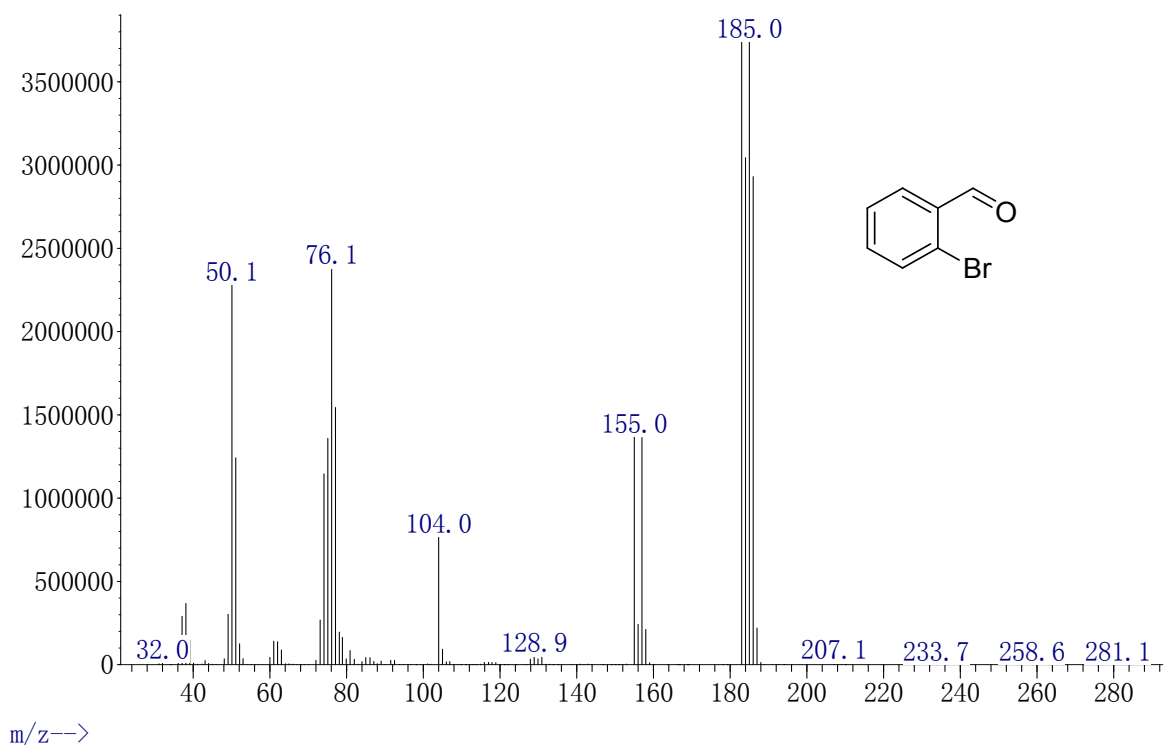

**Figure S29.** GC-MS spectrum of 2-bromobenzaldehyde.

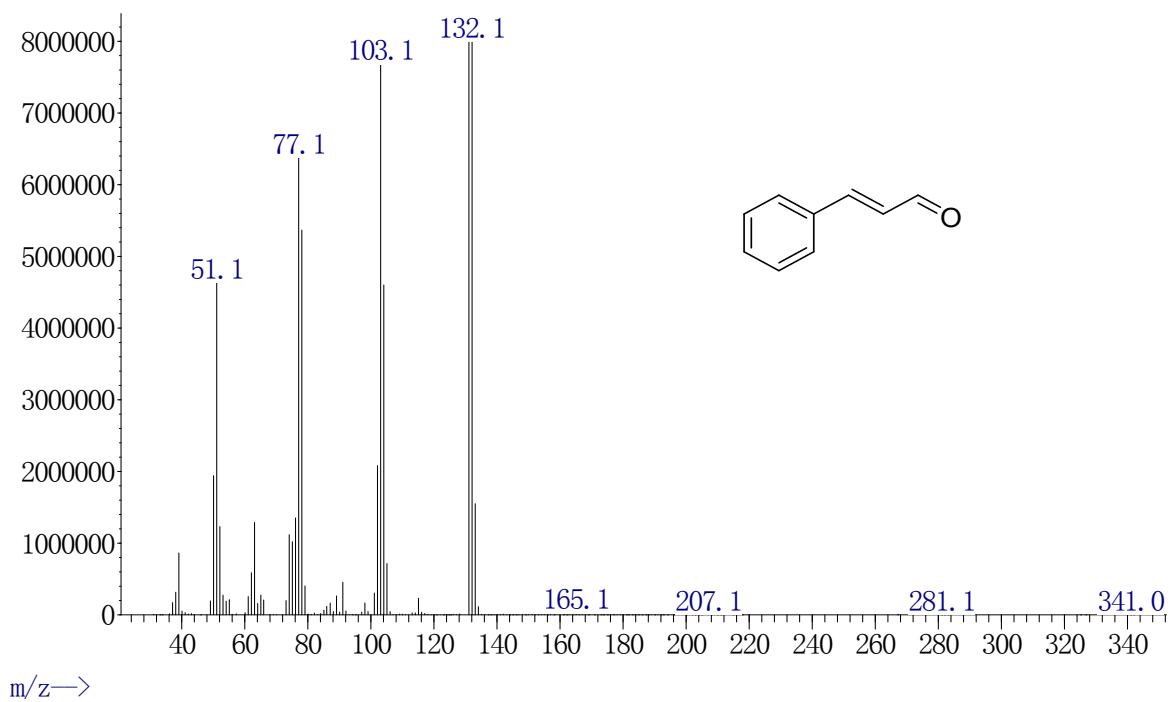

**Figure S30.** GC-MS spectrum of cinnamaldehyde.

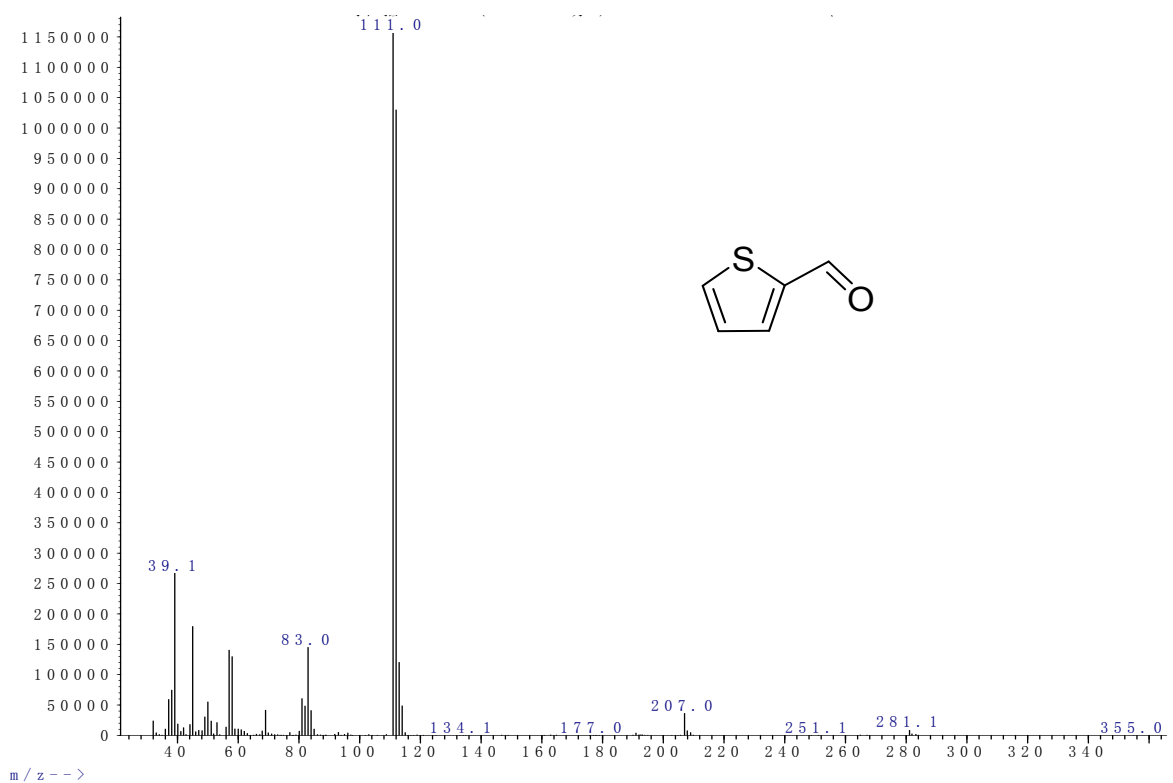

**Figure S31.** GC-MS spectrum of 2-thiophenecarboxaldehyde.

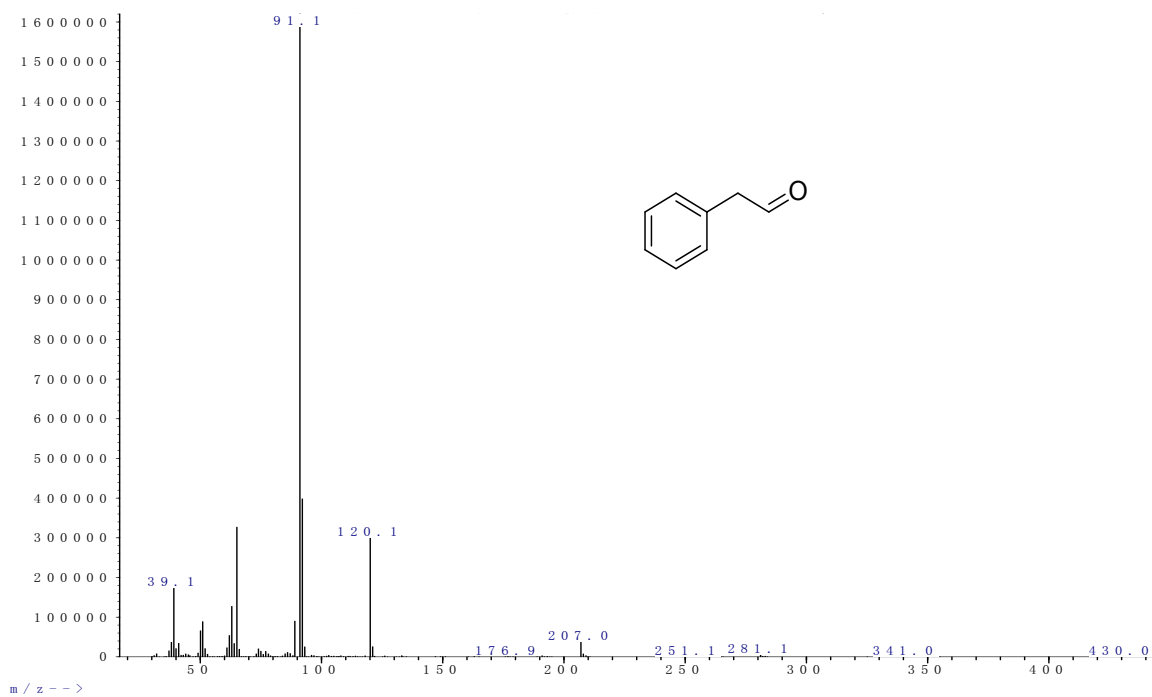

Figure S32. GC-MS spectrum of 2-phenylacetaldehyde.

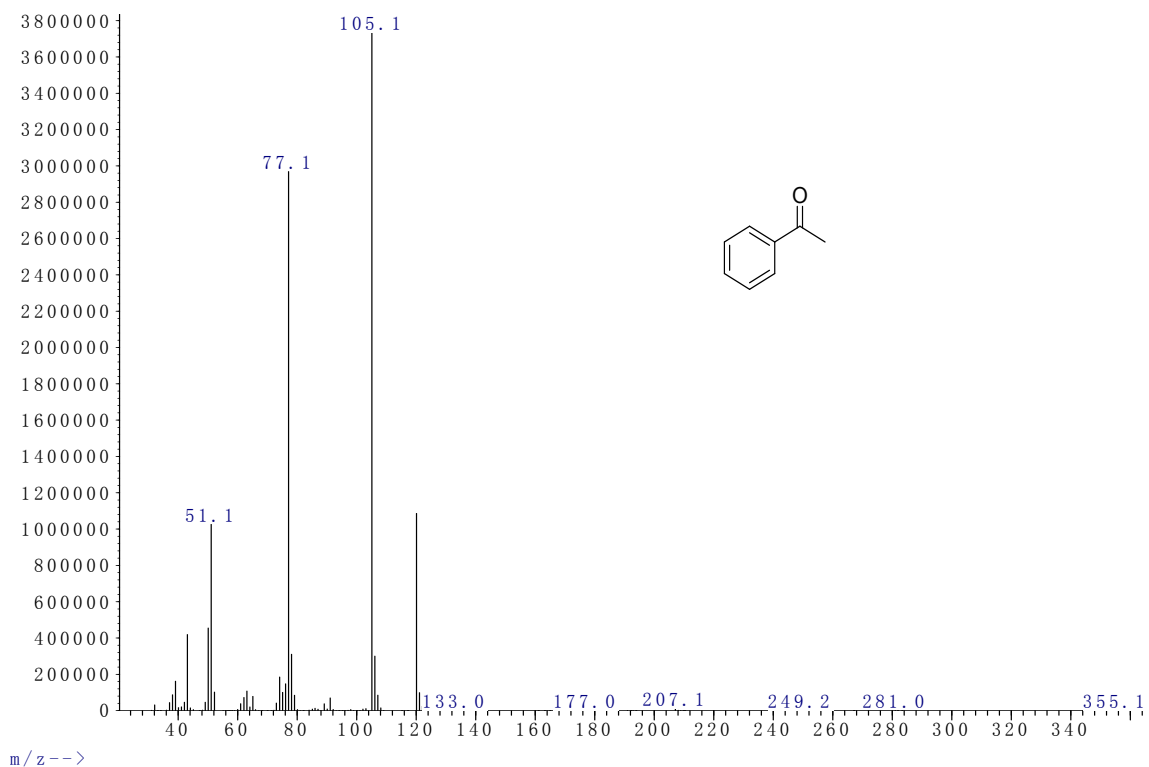

Figure S33. GC-MS spectrum of acetophenone.

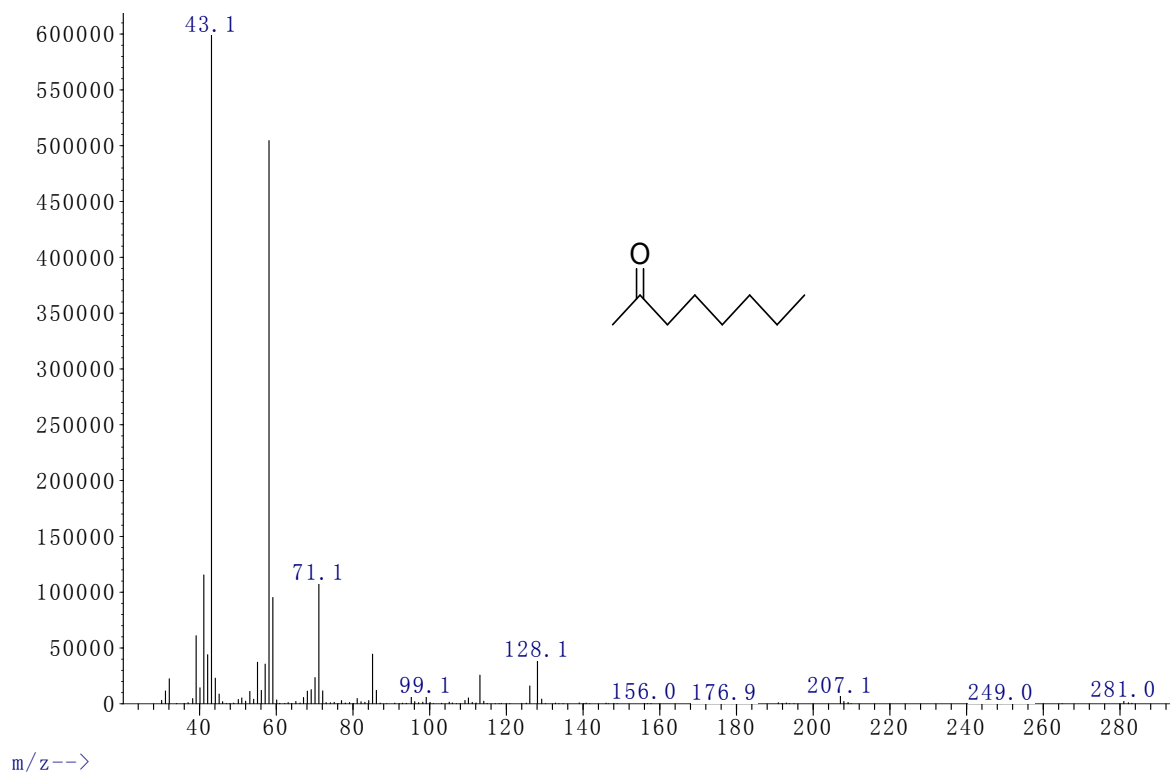

**Figure S34.** GC-MS spectrum of Octan-2-one

#### References:

1. J. M. Hoover, S. S. Stahl, *J. Am. Chem. Soc.* 2011, **133**, 16901-16910.
2. Dadras, M. R. Naimi-Jamal, F. M. Moghaddam and S. E. Ayati, *J. Chem. Sci.* 2018, **130**, 162-171.
3. J. K. Joseph, S. L. Jain and B. Sain, *Eur. J. Org. Chem.* 2006, **3**, 590-594.
4. R. Ali, K. Nour, A. Al-warthan and M. R. H. Siddiqui, *Arab. J. Chem.* 2015, **8**, 512-517.
